# Supplementary material for: Resveratrol downregulates Akt/GSK and ERK signalling pathways in OVCAR-3 ovarian cancer cells
Source: Royal Society of Chemistry journal article supplement (doi:10.1039/c2mb05486h), 2012-01-10
Supplement: c2mb05486h.pdf [file c2mb05486h.pdf]

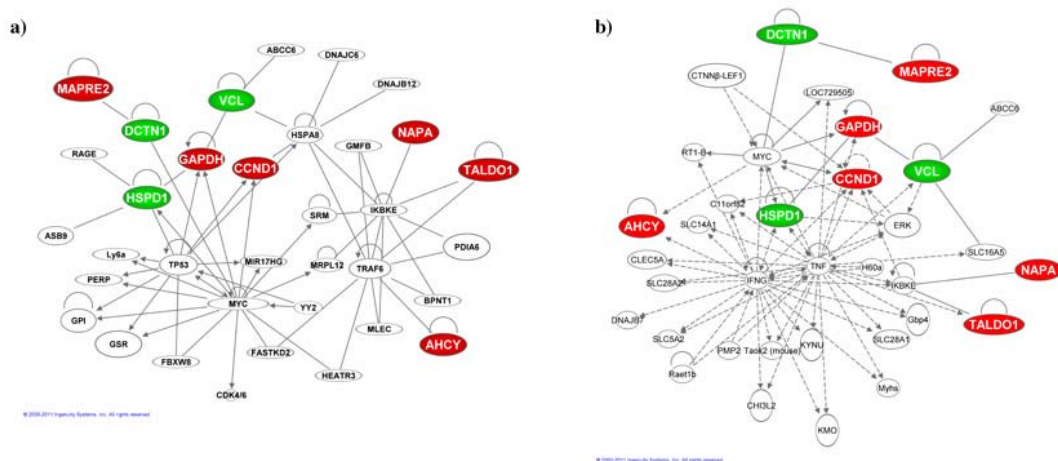

**Supplementary figure 1.** Ingenuity Pathway Analysis of differentially expressed proteins. Differentially expressed proteins showing a 2-fold change or greater were selected and entered into IPA software to illustrate potential interactions. Differentially expressed proteins are shown in green (downregulated) or red (upregulated). Solid and dashed connecting lines indicate the presence of direct (a) and indirect (b) interactions, respectively.

| <b>Supplementary Table 1.</b> Protein spots differentially expressed between control and resveratrol-treated cells |                                          |                  |                    |                |  |
|--------------------------------------------------------------------------------------------------------------------|------------------------------------------|------------------|--------------------|----------------|--|
| Spot number                                                                                                        | Protein name                             | Matched Peptides | Peptides sequence  | Error<br>± ppm |  |
| Spot 1                                                                                                             | Dynactin subunit 1                       | 4                | R.AEITDAEGLGLK.L   | - 61.54        |  |
|                                                                                                                    |                                          |                  | R.AESLQQEVEALK.E   | - 55.95        |  |
|                                                                                                                    |                                          |                  | R.VDELTTDLEILK.A   | - 61.23        |  |
|                                                                                                                    |                                          |                  | K.DSPLLLQQISAMR.L  | - 67.70        |  |
| Spot 3                                                                                                             | Vinculin                                 | 5                | R.SLGEISALTSK.L    | - 64.26        |  |
|                                                                                                                    |                                          |                  | K.MSAEINEIIR.V     | - 50.33        |  |
|                                                                                                                    |                                          |                  | K.ELLPVLISAMK.I    | - 51.87        |  |
|                                                                                                                    |                                          |                  | K.AQQVSQGLDVLTAQ.V | - 59.66        |  |
|                                                                                                                    |                                          |                  | R.VDQLTAQLADLAAR.G | - 52.02        |  |
| Spot 7                                                                                                             | 60 kDa heat shock protein, mitochondrial | 20               | K.APGFGDNR.K       | - 41.47        |  |
|                                                                                                                    |                                          |                  | K.VGEVIVTK.D       | - 49.47        |  |
|                                                                                                                    |                                          |                  | K.LSDGVAVLK.V      | - 46.18        |  |
|                                                                                                                    |                                          |                  | K.VGLQVVAVK.A      | - 66.66        |  |
|                                                                                                                    |                                          |                  | R.VTDALNATR.A      | - 52.90        |  |
|                                                                                                                    |                                          |                  | K.EIGNIISDAMK.K    | - 58.67        |  |
|                                                                                                                    |                                          |                  | K.NAGVEGSLIVEK.I   | - 54.67        |  |
|                                                                                                                    |                                          |                  | K.VGGTSDVEVNEK.K   | - 41.72        |  |
|                                                                                                                    |                                          |                  | R.TVIIEQSWGSPK.V   | - 50.21        |  |
|                                                                                                                    |                                          |                  | R.GYISPYFINTSK.G   | - 39.28        |  |
| R.GVMLAVDAVIAELK.K                                                                                                 | - 53.59                                  |                  |                    |                |  |

|         |                        |    |                               |         |
|---------|------------------------|----|-------------------------------|---------|
|         |                        |    | K.TLNDELEIIEGMK.F             | - 67.28 |
|         |                        |    | K.CEFQDAYVLLSEK.K             | - 44.01 |
|         |                        |    | R.AAVEEGIVLGGGCALLR.C         | - 60.18 |
|         |                        |    | R.CIPALDSLTPANEDQK.I          | - 49.89 |
|         |                        |    | R.CIPALDSLTPANEDQK.I          | - 46.16 |
|         |                        |    | K.ISSIQSIVPALEIANHR.K         | - 51.46 |
|         |                        |    | R.IQEIIQLDVTTSEYEK.E          | - 51.79 |
|         |                        |    | R.ALMLQGVDLLADAVAVTMGPK.G     | - 51.66 |
|         |                        |    | K.LVQDVANNTNEEAGDGTTTATVLAR.S | - 40.44 |
|         |                        |    | R.ESLIDGIK.R                  | - 43.60 |
|         |                        |    | R.IILLAEGR.L                  | - 57.30 |
|         |                        |    | R.ATDVMIAGK.V                 | - 45.94 |
|         |                        |    | K.AGIPVYAWK.G                 | - 46.67 |
|         |                        |    | K.YPQLLPGIR.G                 | - 65.84 |
|         |                        |    | K.YPQLLPGIR.G                 | - 48.98 |
|         |                        |    | K.VADIGLAAWGR.K               | - 52.58 |
|         |                        |    | K.VAVVAGYGDVGK.G              | - 53.14 |
| Spot 8  | Adenosylhomocysteinase | 16 | K.VPAINVNDVTK.S               | - 68.46 |
|         |                        |    | K.KLDEAVAEHLGK.L              | - 40.42 |
|         |                        |    | K.ALDIAENEMPGLMR.M            | - 48.15 |
|         |                        |    | K.ALDIAENEMPGLM*R.M           | - 44.69 |
|         |                        |    | R.GISEETTTGVHNLYK.M           | - 52.46 |
|         |                        |    | R.GISEETTTGVHNLYK.M           | - 41.97 |
|         |                        |    | K.DGPLNMILDDGGDLTNLIHTK.Y     | - 47.57 |
|         |                        |    | K.DGPLNMILDDGGDLTNLIHTK.Y     | - 45.97 |
|         |                        |    | K.AAQASDLEK.I                 | - 39.07 |
| Spot 12 | Transaldolase          | 9  | K.TIVMGASFR.N                 | - 42.31 |
|         |                        |    | R.MESALDQLK.Q                 | - 37.66 |

|         |                                                                               |        |                              |         |
|---------|-------------------------------------------------------------------------------|--------|------------------------------|---------|
|         |                                                                               |        | K.LLGELLQDNAK.L              | - 37.21 |
|         |                                                                               |        | K.LLGELLQDNAK.L              | 805     |
|         |                                                                               |        | K.SYELEDPGVK.S               | - 35.06 |
|         |                                                                               |        | K.LFVLFGAELK.K               | - 32.94 |
|         |                                                                               |        | K.LSSTWEGIQAGK.E             | - 42.69 |
|         |                                                                               |        | K.ALAGCDFLTISPK.L            | - 55.21 |
| Spot 13 | G1/S-specific cyclin-D1                                                       | 2      | R.LQLLGATCMFVASK.M           | - 40.97 |
|         |                                                                               |        | K.FISNPPSMVAAGSVVAAVQGLNLR.S | - 32.90 |
|         |                                                                               |        | K.VGVNGFGR.I                 | - 52.97 |
|         |                                                                               |        | K.QASEGPLK.G                 | - 44.50 |
|         |                                                                               |        | K.AGAHLQGGAK.R               | - 30.99 |
|         |                                                                               |        | R.VVDLMAHMASK.E              | - 44.01 |
|         |                                                                               |        | R.VVDLMAHMASK.E              | -40.24  |
|         |                                                                               |        | R.VPTANVSVVDLTCR.L           | -71.48  |
|         |                                                                               |        | K.LVINGNPITIFQER.D           | 566     |
|         |                                                                               |        | K.LISWYDNEFGYSNR.V           | - 85.45 |
| Spot 14 | Glyceraldehyde-3-phosphate dehydrogenase/Alpha-soluble NSF attachment protein | 14 / 9 | K.IISNASCTTNCLAPLAK.V        | - 36.98 |
|         |                                                                               |        | K.IISNASCTTNCLAPLAK.V        | 494     |
|         |                                                                               |        | R.VIISAPSADAPMFVMGVNHEK.Y    | - 93.61 |
|         |                                                                               |        | K.WGDAGAEYVVESTGVFTTMEK.A    | - 60.32 |
|         |                                                                               |        | K.WGDAGAEYVVESTGVFTTMEK.A    | - 59.95 |
|         |                                                                               |        | K.VIHDNFGIVEGLMTTVHAITATQK.T | - 46.14 |
|         |                                                                               |        | /                            | /       |
|         |                                                                               |        | R.AIEIYTMGR.F                | - 47.91 |
|         |                                                                               |        | K.TIQGDEEDLR.-               | - 29.06 |
|         |                                                                               |        | K.IEEACEIYAR.A               | - 40.95 |
|         |                                                                               |        | R.LDQWLTTMLLR.I              | - 57.71 |
|         |                                                                               |        | K.EAEAMALLAEAER.K            | - 67.24 |

|             |                                                                              |       |                           |         |
|-------------|------------------------------------------------------------------------------|-------|---------------------------|---------|
|             |                                                                              |       | K.YEELFPAFSDSR.E          | - 62.68 |
|             |                                                                              |       | K.NSQSFFSGLFGGSSK.I       | - 62.79 |
|             |                                                                              |       | K.AIAHYEQSADYYK.G         | - 32.39 |
|             |                                                                              |       | K.AALCHFCIDMLNAK.L        | - 53.92 |
|             |                                                                              |       | R.GALQNIIPASTGAAK.A       | -53.45  |
|             |                                                                              |       | R.VPTANVSVDLTCR.L         | -59.32  |
|             |                                                                              |       | K.LVINGNPITIFQER.D        | -60.03  |
|             |                                                                              |       | K.LISWYDNEFGYSNR.V        | -48.35  |
|             |                                                                              |       | R.VIISAPSADAPMFVMGVNHEK.Y | -46.27  |
|             |                                                                              |       | /                         | /       |
| Spot 15     | Glyceraldehyde-3-phosphate dehydrogenase / Microtubule-associated protein RP | 5 / 7 | K.LTVEDLEK.E              | -48.45  |
|             |                                                                              |       | K.FFDANYDGK.D             | -48.00  |
|             |                                                                              |       | K.LEHEYIQNFK.I            | -42.13  |
|             |                                                                              |       | K.FQDNFEFVQWFK.K          | -46.70  |
|             |                                                                              |       | R.QGQETA VAPSLVAPALNKPK.K | -50.56  |
|             |                                                                              |       | R.NIELICQENEGENDPVLQR.I   | -48.77  |
|             |                                                                              |       | R.NIELICQENEGENDPVLQR.I   | -42.57  |
| Spot 18     | Dextrin                                                                      | 3     | K.AVIFCLSADK.K            | - 68.66 |
|             |                                                                              |       | R.YALYDASFETK.E           | - 39.39 |
|             |                                                                              |       | K.EILVGDVGVTTITDPFK.H     | - 55.40 |
| * Oxidation |                                                                              |       |                           |         |
